# Supplementary material
Source: Research Square preprint supplement (doi:10.21203/rs.3.rs-9515060/v1)
Supplement: Supplementary file 1 [file 5ef1daeba156dda046ede5d3.docx]

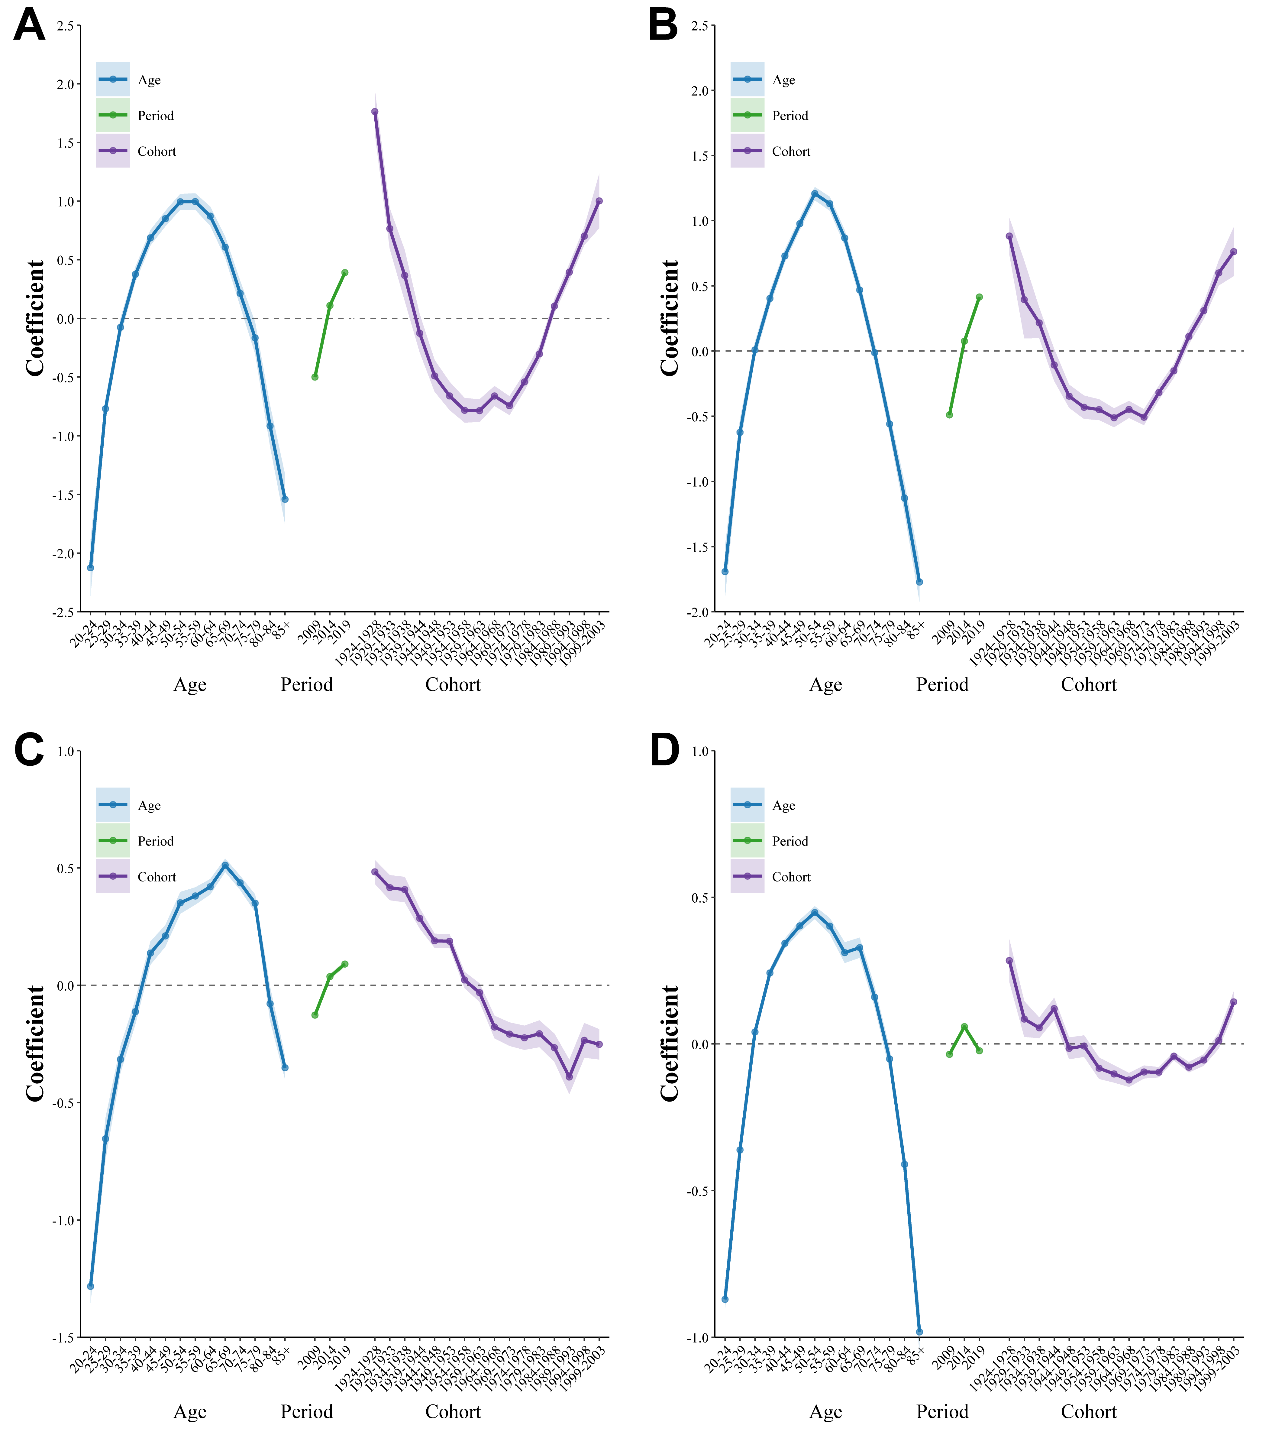


Fig. S1. Age-period-cohort model analysis of thyroid cancer incidence in China and the U.S. (A)Thyroid cancer incidence among males in China, (B)thyroid cancer incidence among females in China, (C) thyroid cancer incidence among males in the U.S. and (D) thyroid cancer incidence among females in the U.S.


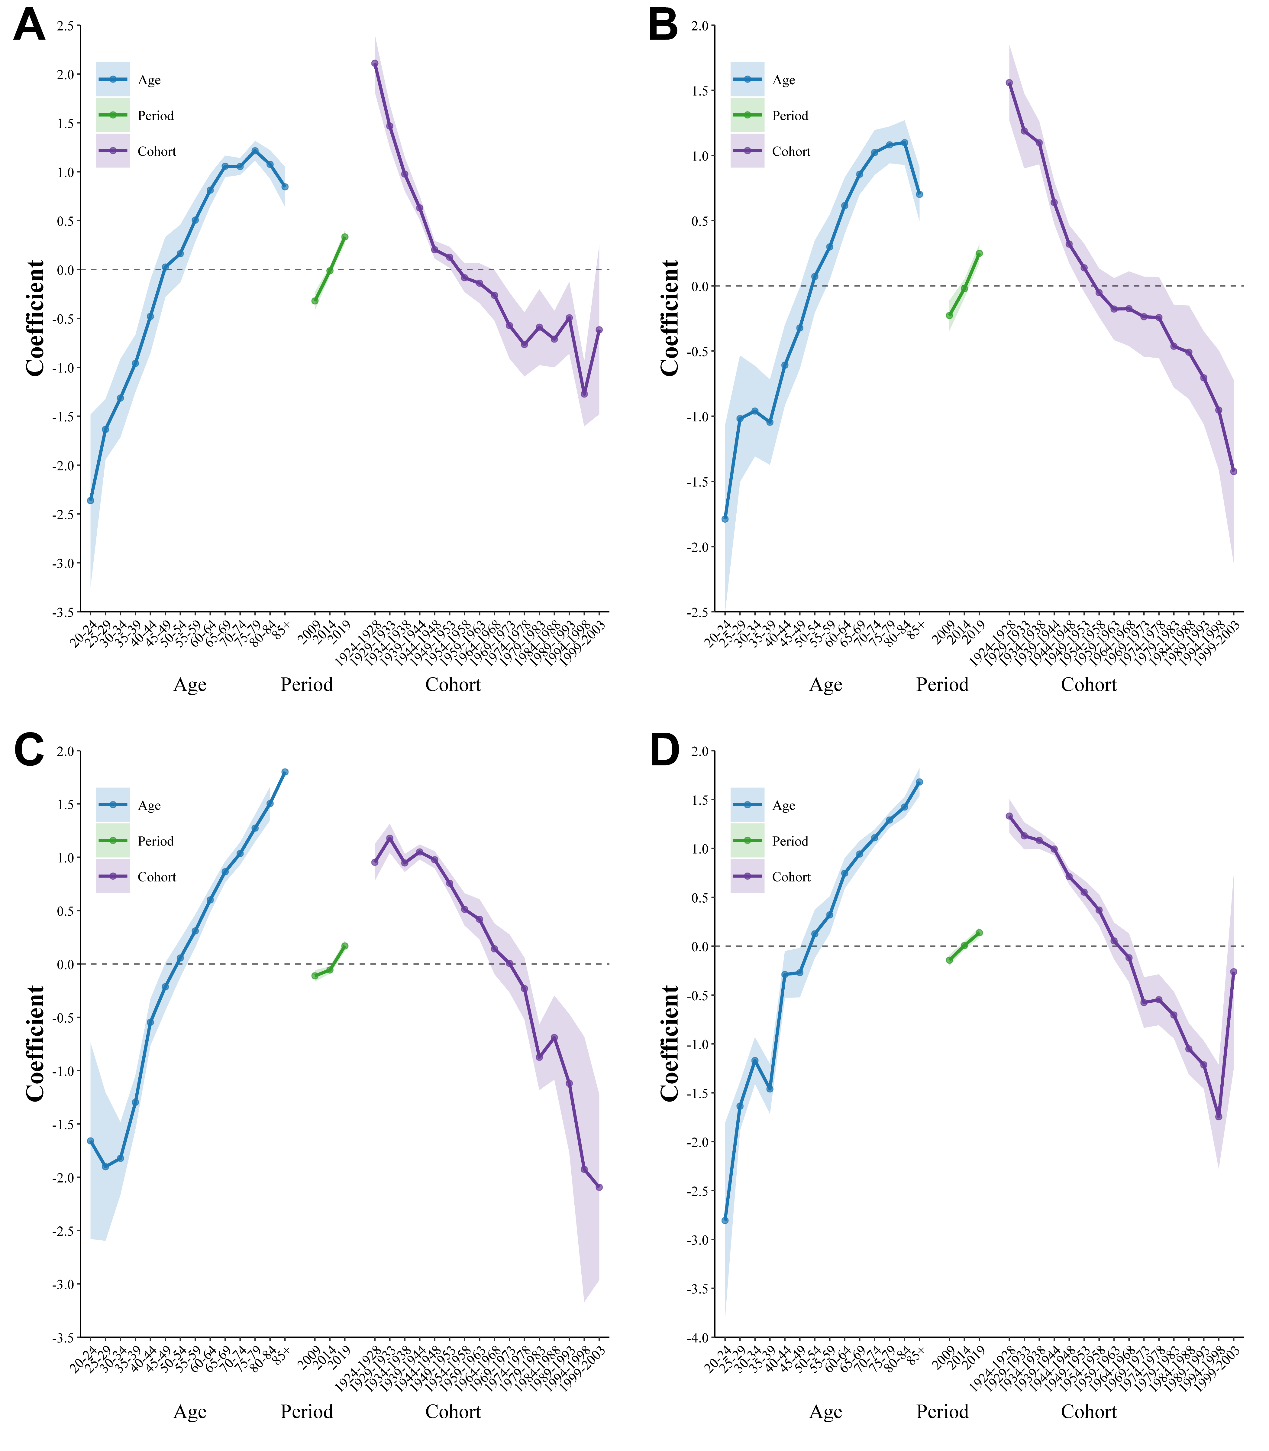


Fig. S2. Age-period-cohort model analysis of thyroid cancer mortality in China and the U.S. (A)Thyroid cancer mortality among males in China, (B)thyroid cancer mortality among females in China, (C) thyroid cancer mortality among males in the U.S. and (D) thyroid cancer mortality among females in the U.S.


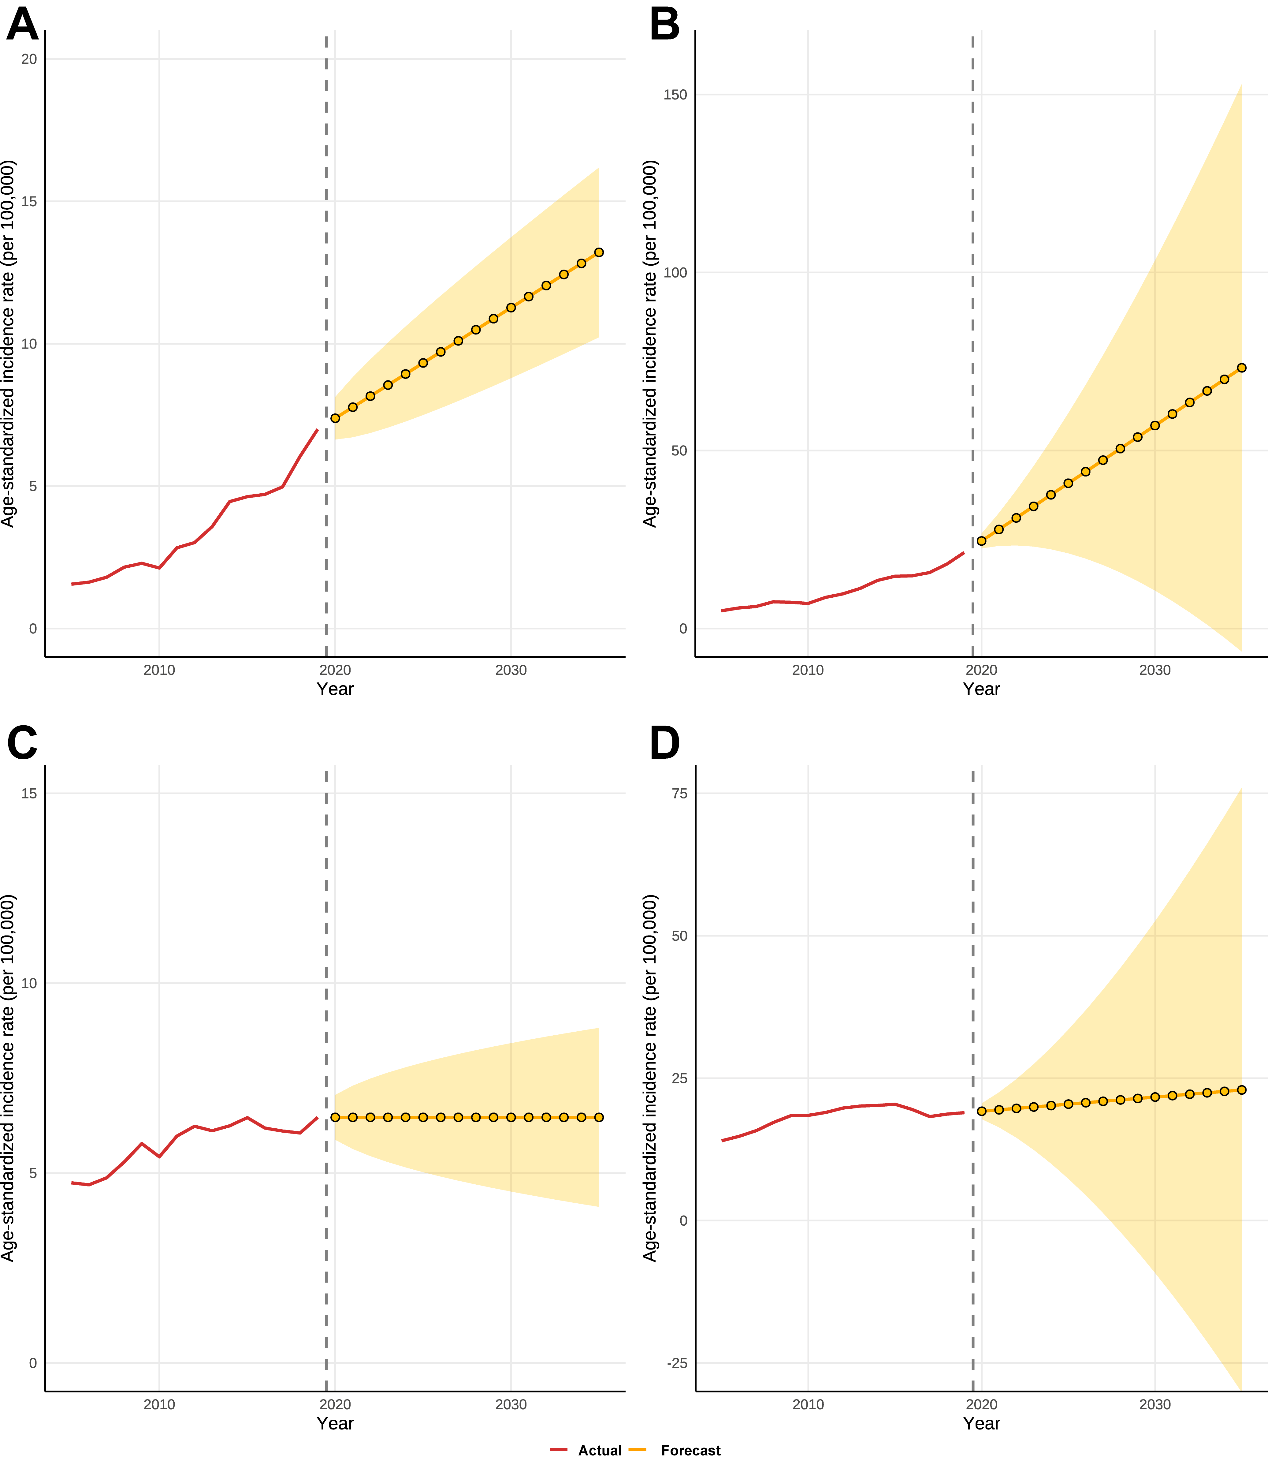


Fig. S3. Time trends of ASIR in thyroid cancer in China and the U.S. from 2005 to 2035. (A) ASIR among males in China, (B) ASIR among males in China, (C) ASIR among males in the U.S. and (D) ASIR among females in the U.S.


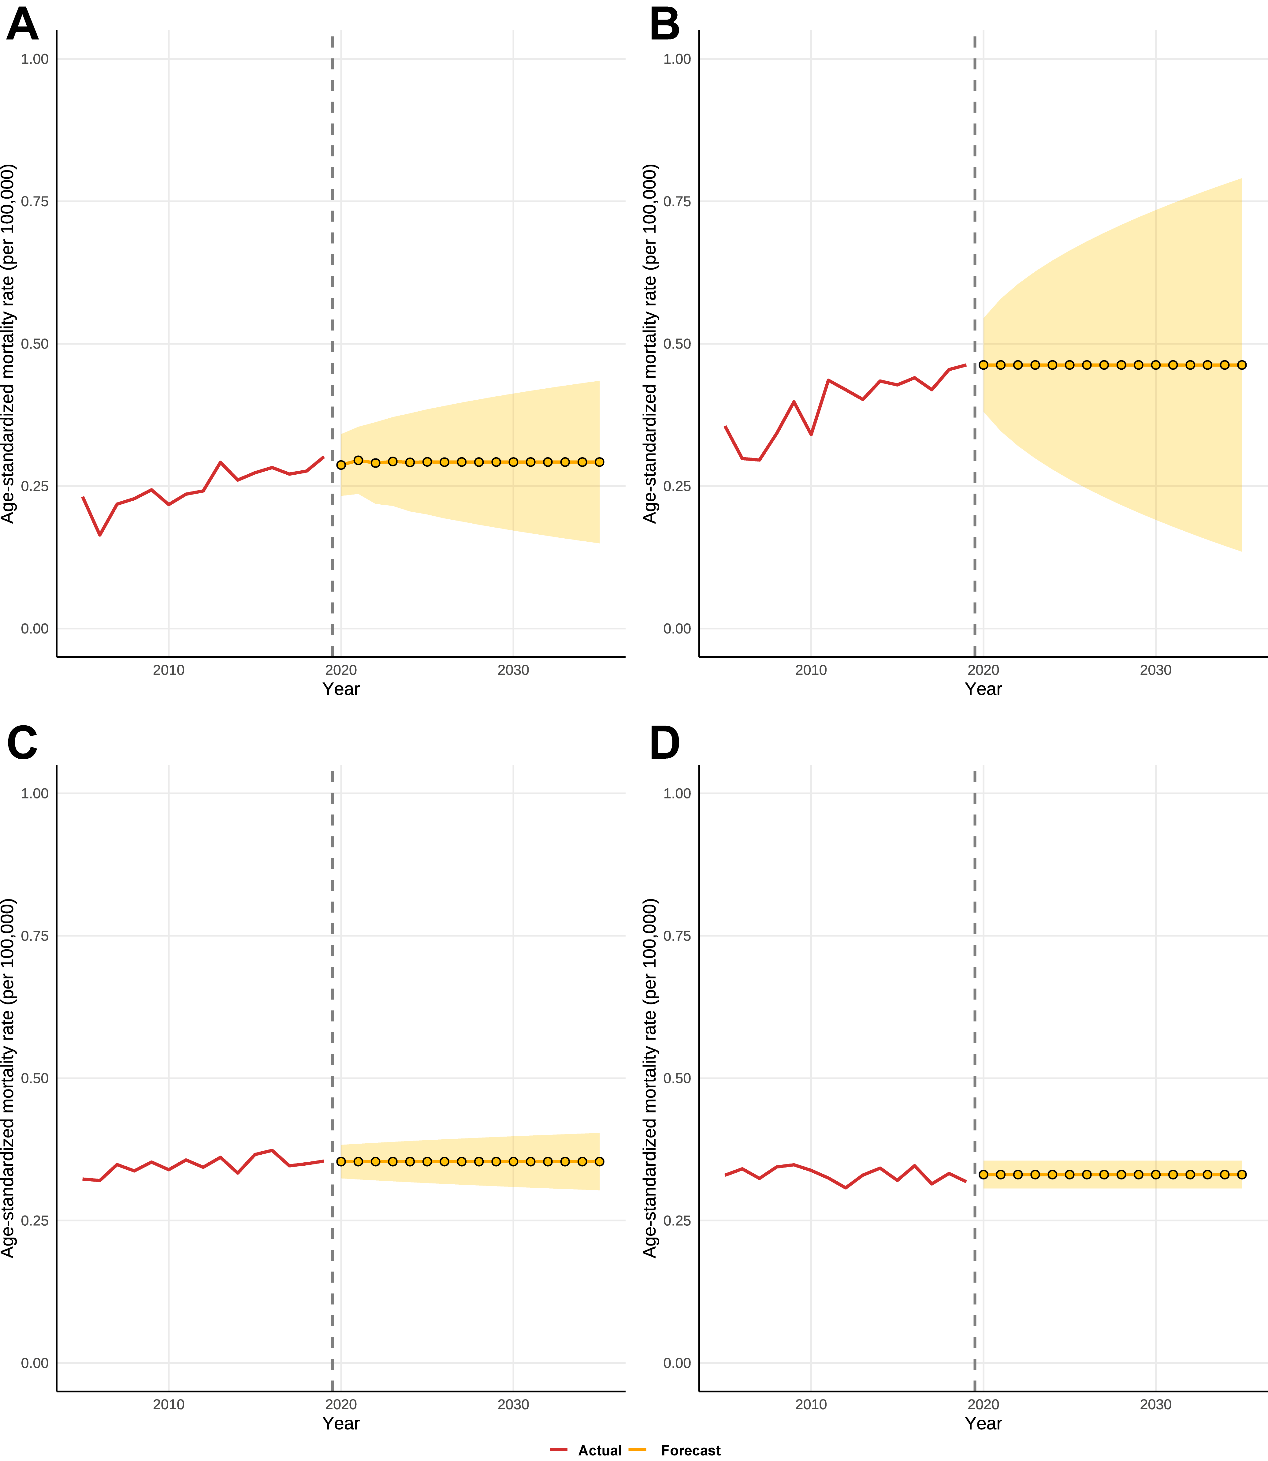


Fig. S4. Time trends of ASMR in thyroid cancer in China and the U.S. from 2005 to 2035. (A) ASMR among males in China, (B) ASMR among males in China, (C) ASMR among males in the U.S. and (D) ASMR among females in the U.S.

**Table S1.** Incidence and mortality of thyroid cancer by sex and year in China and the U.S., 2005-2019.

| Country | Year | Incidence (per 100,000) | | | | | | Mortality (per 100,000) | | | | | |
| --- | --- | --- | --- | --- | --- | --- | --- | --- | --- | --- | --- | --- | --- |
| Crude rate | | | ASIR | | | Crude rate | | | ASMR | | |
| Both | Male | Female | Both | Male | Female | Both | Male | Female | Both | Male | Female |
| China |  |  |  |  |  |  |  |  |  |  |  |  |  |
|  | 2005 | 4.30 | 1.98 | 6.68 | 3.48 | 1.69 | 5.36 | 0.45 | 0.17 | 0.26 | 0.36 | 0.28 | 0.42 |
|  | 2006 | 5.00 | 2.20 | 7.84 | 3.99 | 1.78 | 6.23 | 0.37 | 0.12 | 0.22 | 0.28 | 0.21 | 0.35 |
|  | 2007 | 5.37 | 2.42 | 8.38 | 4.30 | 1.96 | 6.66 | 0.41 | 0.16 | 0.20 | 0.31 | 0.26 | 0.35 |
|  | 2008 | 6.71 | 2.98 | 10.49 | 5.21 | 2.35 | 8.10 | 0.50 | 0.17 | 0.25 | 0.35 | 0.27 | 0.42 |
|  | 2009 | 6.56 | 3.11 | 10.09 | 5.19 | 2.48 | 7.95 | 0.53 | 0.17 | 0.29 | 0.39 | 0.29 | 0.48 |
|  | 2010 | 6.21 | 2.86 | 9.64 | 4.93 | 2.30 | 7.61 | 0.44 | 0.22 | 0.36 | 0.33 | 0.25 | 0.40 |
|  | 2011 | 7.84 | 3.82 | 11.95 | 6.23 | 3.09 | 9.41 | 0.53 | 0.24 | 0.46 | 0.40 | 0.27 | 0.51 |
|  | 2012 | 8.67 | 4.08 | 13.37 | 6.86 | 3.28 | 10.50 | 0.52 | 0.24 | 0.44 | 0.38 | 0.28 | 0.48 |
|  | 2013 | 10.16 | 4.87 | 15.60 | 8.01 | 3.91 | 12.18 | 0.51 | 0.23 | 0.42 | 0.37 | 0.35 | 0.46 |
|  | 2014 | 12.29 | 6.05 | 18.72 | 9.70 | 4.87 | 14.63 | 0.56 | 0.27 | 0.45 | 0.40 | 0.30 | 0.50 |
|  | 2015 | 13.17 | 6.25 | 20.28 | 10.44 | 5.07 | 15.91 | 0.58 | 0.28 | 0.45 | 0.40 | 0.32 | 0.49 |
|  | 2016 | 13.22 | 6.32 | 20.32 | 10.54 | 5.15 | 16.03 | 0.59 | 0.29 | 0.46 | 0.41 | 0.32 | 0.50 |
|  | 2017 | 13.91 | 6.59 | 21.43 | 11.19 | 5.44 | 17.03 | 0.58 | 0.28 | 0.43 | 0.40 | 0.32 | 0.48 |
|  | 2018 | 16.17 | 7.98 | 24.60 | 13.06 | 6.61 | 19.64 | 0.62 | 0.28 | 0.47 | 0.42 | 0.32 | 0.52 |
|  | 2019 | 18.96 | 9.23 | 28.98 | 15.35 | 7.67 | 23.19 | 0.67 | 0.50 | 0.84 | 0.44 | 0.34 | 0.53 |
| The U.S. |  |  |  |  |  |  |  |  |  |  |  |  |  |
|  | 2005 | 9.40 | 4.67 | 14.01 | 9.40 | 4.74 | 14.01 | 0.33 | 0.32 | 0.33 | 0.33 | 0.32 | 0.33 |
|  | 2006 | 9.83 | 4.72 | 14.78 | 9.83 | 4.69 | 14.78 | 0.33 | 0.32 | 0.34 | 0.33 | 0.32 | 0.34 |
|  | 2007 | 10.51 | 5.08 | 15.79 | 10.50 | 4.88 | 15.79 | 0.34 | 0.35 | 0.32 | 0.34 | 0.35 | 0.32 |
|  | 2008 | 11.44 | 5.48 | 17.24 | 11.44 | 5.29 | 17.24 | 0.34 | 0.34 | 0.34 | 0.34 | 0.34 | 0.34 |
|  | 2009 | 12.26 | 5.92 | 18.42 | 12.26 | 5.78 | 18.42 | 0.35 | 0.35 | 0.35 | 0.35 | 0.35 | 0.35 |
|  | 2010 | 12.29 | 5.94 | 18.47 | 12.29 | 5.43 | 18.47 | 0.34 | 0.34 | 0.34 | 0.34 | 0.34 | 0.34 |
|  | 2011 | 12.64 | 6.15 | 18.98 | 12.64 | 5.97 | 18.98 | 0.34 | 0.36 | 0.33 | 0.34 | 0.36 | 0.32 |
|  | 2012 | 13.09 | 6.28 | 19.75 | 13.09 | 6.23 | 19.75 | 0.33 | 0.34 | 0.31 | 0.32 | 0.34 | 0.31 |
|  | 2013 | 13.40 | 6.57 | 20.11 | 13.40 | 6.12 | 20.11 | 0.35 | 0.36 | 0.33 | 0.35 | 0.36 | 0.33 |
|  | 2014 | 13.45 | 6.58 | 20.21 | 13.45 | 6.25 | 20.21 | 0.34 | 0.33 | 0.34 | 0.34 | 0.33 | 0.34 |
|  | 2015 | 13.58 | 6.67 | 20.42 | 13.58 | 6.46 | 20.42 | 0.34 | 0.37 | 0.32 | 0.34 | 0.37 | 0.32 |
|  | 2016 | 12.99 | 6.44 | 19.49 | 12.99 | 6.19 | 19.49 | 0.36 | 0.37 | 0.35 | 0.36 | 0.37 | 0.35 |
|  | 2017 | 12.30 | 6.31 | 18.25 | 12.29 | 6.11 | 18.25 | 0.33 | 0.35 | 0.32 | 0.33 | 0.35 | 0.31 |
|  | 2018 | 12.52 | 6.32 | 18.69 | 12.52 | 6.06 | 18.69 | 0.34 | 0.35 | 0.33 | 0.34 | 0.35 | 0.33 |
|  | 2019 | 12.76 | 6.58 | 18.94 | 12.75 | 6.47 | 18.94 | 0.34 | 0.36 | 0.32 | 0.34 | 0.35 | 0.32 |

ASIR: age-adjusted incidence rate of the world population, ASMR: age-adjusted mortality rate of the world population.

**Table S2.** Joinpoint regression analysis: APC and AAPC of age-adjusted incidence rates for gallbladder cancer in China and the U.S. between 2005 and 2019.

| Variables | Sex | Trend1 | | Trend2 | | Trend3 | | | Trend4 | | | Overall (2005-2019) | |
| --- | --- | --- | --- | --- | --- | --- | --- | --- | --- | --- | --- | --- | --- |
| Period | APC (95%CI) | Period | APC (95%CI) | | Period | APC (95%CI) | | Period | APC (95%CI) | | AAPC (95%CI) |
| Incidence |  |  |  |  |  | |  |  | |  |  | |  |
| China | Both | 2005-2010 | 6.20*(1.25,11.39) | 2010-2014 | 16.88*(11.1,22.95) | | 2014-2017 | 4.96(-1.11,11.41) | | 2017-2019 | 17.14*(12.47,22.00) | | 10.41*(8.37,12.48) |
|  | Male | 2005-2010 | 6.97*(1.41,12.83) | 2010-2014 | 18.09*(11.73,24.80) | | 2014-2017 | 4.66(-1.97,11.74) | | 2017-2019 | 18.67*(13.57,24.00) | | 11.16*(8.89,13.47) |
|  | Female | 2005-2011 | 7.59*(1.32,14.26) | 2011-2014 | 17.95*(0.14,38.94) | | 2014-2017 | 4.80(-5.85,16.65) | | 2017-2019 | 16.76*(8.50,25.66) | | 10.40*(6.55,14.39) |
| The U.S. | Both | 2005-2009 | 6.86*(5.49,8.26) | 2009-2014 | 2.48*(1.33,3.64) | | 2014-2017 | -3.13(-6.39,0.25) | | 2017-2019 | 1.06(-2.38,4.63) | | 2.27*(1.52,3.02) |
|  | Male | 2005-2012 | 4.28*(2.63,5.95) | 2012-2019 | 0.17(-1.18,1.53) | |  |  | |  |  | | 2.20*(1.27,3.14) |
|  | Female | 2005-2009 | 7.01*(5.67,8.37) | 2009-2014 | 2.47*(1.35,3.60) | | 2014-2017 | -3.41*(-6.60,-0.11) | | 2017-2019 | 0.92(-2.47,4.44) | | 2.22*(1.49,2.96) |
| Mortality |  |  |  |  |  | |  |  | |  |  | |  |
| China | Both | 2005-2019 | 2.02*(1.31,2.75) |  |  | |  |  | |  |  | | 2.02*(1.31,2.75) |
|  | Male | 2005-2019 | 2.07*(1.08,3.06) |  |  | |  |  | |  |  | | 2.07*(1.08,3.06) |
|  | Female | 2005-2019 | 1.89*(1.01,2.78) |  |  | |  |  | |  |  | | 1.89*(1.01,2.78) |
| The U.S. | Both | 2005-2019 | 0.10(-0.26,0.47) |  |  | |  |  | |  |  | | 0.10(-0.26,0.47) |
|  | Male | 2005-2019 | 0.55*(0.08,1.01) |  |  | |  |  | |  |  | | 0.55*(0.08,1.01) |
|  | Female | 2005-2019 | -0.26(-0.74,0.22) |  |  | |  |  | |  |  | | -0.26(-0.74,0.22) |

APC: annual percent change, AAPC: average annual percent change presented for the full period, CI: confidence interval, *: P < 0.05
